# Supplementary material for: Superior sodium storage of novel VO2nano-microspheres encapsulated into crumpled reduced graphene oxide
Source: Royal Society of Chemistry journal article supplement (doi:10.1039/c6ta10309j), 2017-01-01
Supplement: c6ta10309j1.pdf [file c6ta10309j1.pdf]

## Supporting Information

### Superior Sodium Storage of Novel VO<sub>2</sub> Nano-microspheres Encapsulated into Crumpled Reduced Graphene Oxide

Bo Yan,<sup>a, c</sup> Xifei Li,<sup>\*b, c</sup> Zhimin Bai,<sup>\*a</sup> Liangxu Lin,<sup>d</sup> Gang Chen,<sup>e</sup> Xiaosheng Song,<sup>c</sup>  
Dongbin Xiong,<sup>c</sup> Dejun Li,<sup>c</sup> Xueliang Sun<sup>f, c</sup>

<sup>a</sup>*Beijing Key Laboratory of Materials Utilization of Nonmetallic Minerals and Solid Wastes, National Laboratory of Mineral Materials, School of Materials Science and Technology, China University of Geosciences, Beijing 100083, China. E-mail: [zhimibai@cugb.edu.cn](mailto:zhimibai@cugb.edu.cn); Tel: +86-13691115187*

<sup>b</sup>*Center for Advanced Energy Materials and Devices, Xi'an University of Technology, Xi'an 710048, China. E-mail: [xfli2011@hotmail.com](mailto:xfli2011@hotmail.com); Tel: +86-13502042013*

<sup>c</sup>*Tianjin International Joint Research Centre of Surface Technology for Energy Storage Materials, College of Physics and Materials Science, Tianjin Normal University, Tianjin 300387, China.*

<sup>d</sup>*College of Engineering, Mathematics and Physical Sciences, University of Exeter, Exeter, EX44QL, UK*

<sup>e</sup>*School of Physical Science and Technology, ShanghaiTech University, Shanghai 201210, China.*

<sup>f</sup>*Nanomaterials and Energy Lab, Department of Mechanical and Materials Engineering, University of Western Ontario, London, Ontario N6A 5B9, Canada. E-mail: [xsun@eng.uwo.ca](mailto:xsun@eng.uwo.ca)*

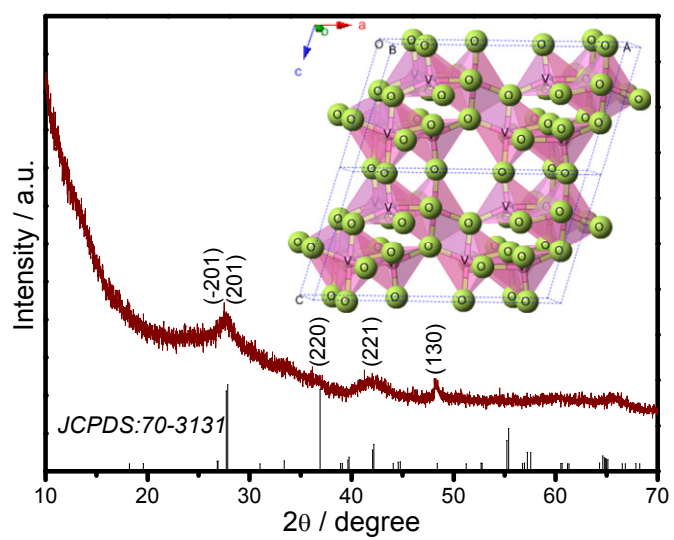

**Fig. S1** XRD patterns for cG/VO<sub>2</sub>. Inset shows the crystalline structure of monoclinic VO<sub>2</sub>(B).

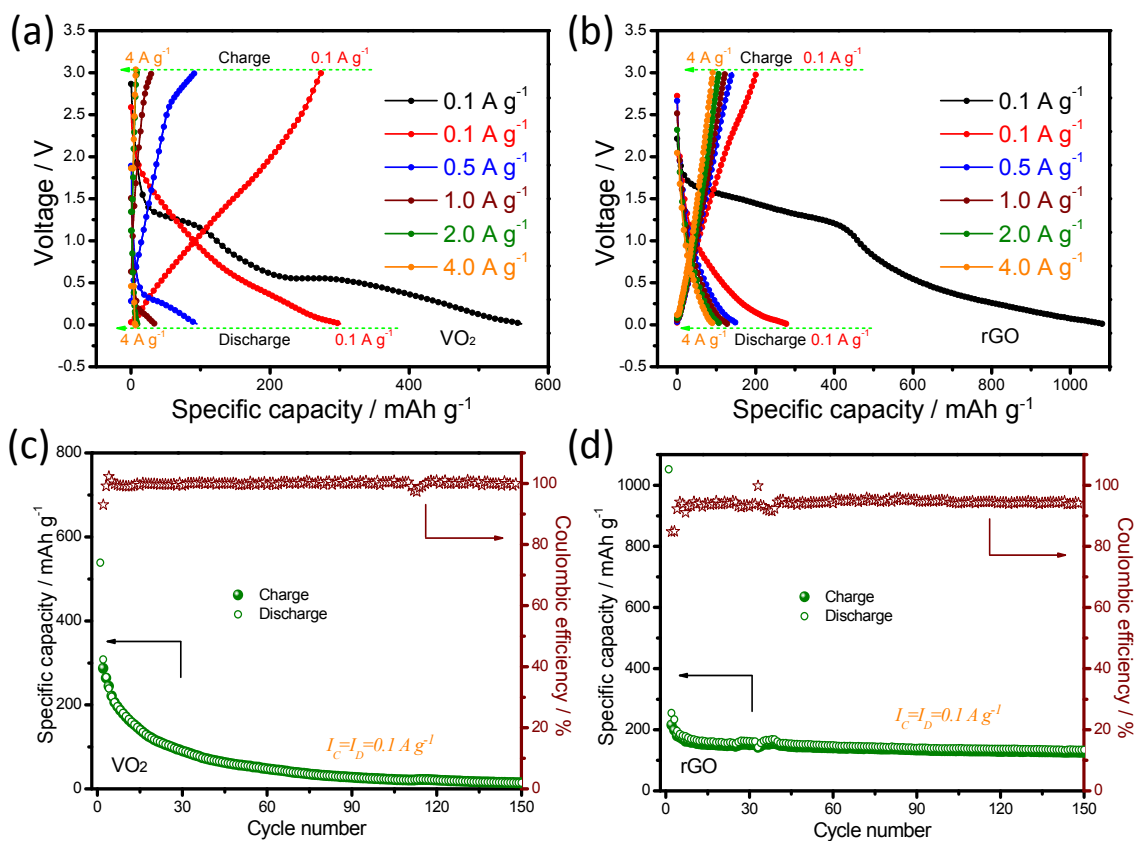

**Fig. S2** Electrochemical properties of the prepared materials: Galvanostatic charge/discharge voltage profiles at various current densities of the (a) pristine VO<sub>2</sub> and (b) rGO. Cycling performance and Coulombic efficiency of the (c) pristine VO<sub>2</sub> and (d) rGO electrode at a current density of 0.1 A g<sup>-1</sup>.

**Table S1.** The summarization of as-prepared cG/VO<sub>2</sub> and the VO<sub>2</sub> anode previously reported in the literature.

| VO <sub>2</sub> materials                    | Synthetic method                | Voltage range | Current density | The third discharge capacity (mAh g <sup>-1</sup> ) | Capacity retention (%)  | Rate capacity (mAh g <sup>-1</sup> ) at relevant current density | Ref. |
|----------------------------------------------|---------------------------------|---------------|-----------------|-----------------------------------------------------|-------------------------|------------------------------------------------------------------|------|
| rGO/VO <sub>2</sub> nanorods (10 wt%/90 wt%) | Microwave-assisted solvothermal | 0.25 ~ 3.0 V  | 60 mA/g         | 220                                                 | 82.7 (after 200 cycles) | 100 at 0.8 A/g                                                   | [1]  |
| cG/VO <sub>2</sub> (10.5 wt% /89.5 wt%)      | Solvothermal                    | 0.01 ~ 3.0 V  | 100 mA/g        | 378                                                 | 84.2 (after 200 cycles) | 307 at 1 A/g;<br>214 at 4 A/g                                    | Ours |

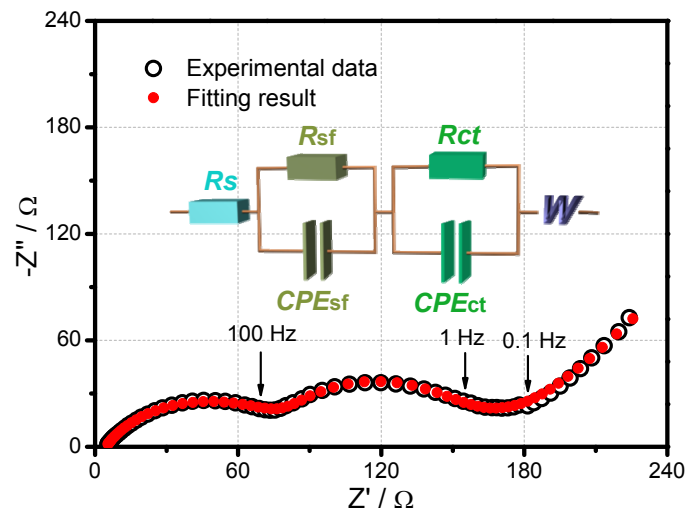

**Fig. S3** The typical fitting data of Nyquist plot for cG/VO<sub>2</sub> anode discharged to 0.01 V in the 2<sup>nd</sup> cycle.

**Table S2.** Typical fitting parameters of cG/VO<sub>2</sub> anode discharged to 0.01 Vin the 2<sup>nd</sup> cycle.

|                 |                    |                |
|-----------------|--------------------|----------------|
| Electrolyte     | $R_e$              | 4.576 $\Omega$ |
| SEI             | $R_{sf}$           | 80.29 $\Omega$ |
|                 | $CPE_{sf-T}$       | 5.3306E-05     |
|                 | $CPE_{sf-P}$       | 0.6943         |
| Charge transfer | $R_{ct}$           | 55.84 $\Omega$ |
|                 | $CPE_{ct-T}$       | 4.2153E-04     |
|                 | $CPE_{ct-P}$       | 0.9734         |
| Diffusion       | $R_d$ of $W_{dif}$ | 113.7 $\Omega$ |
|                 | $T$ of $W_{dif}$   | 2.561          |
|                 | $P$ of $W_{dif}$   | 0.3026         |

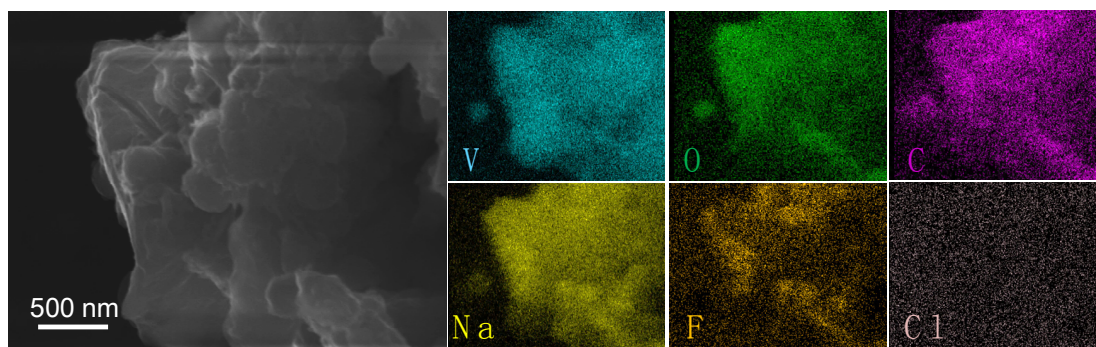

**Fig. S4** Elemental mapping of the cG/VO<sub>2</sub> electrode discharged to 1.6 V in the 2<sup>nd</sup> cycle. The intensity of chlorine map can be served as a contrastive benchmark.

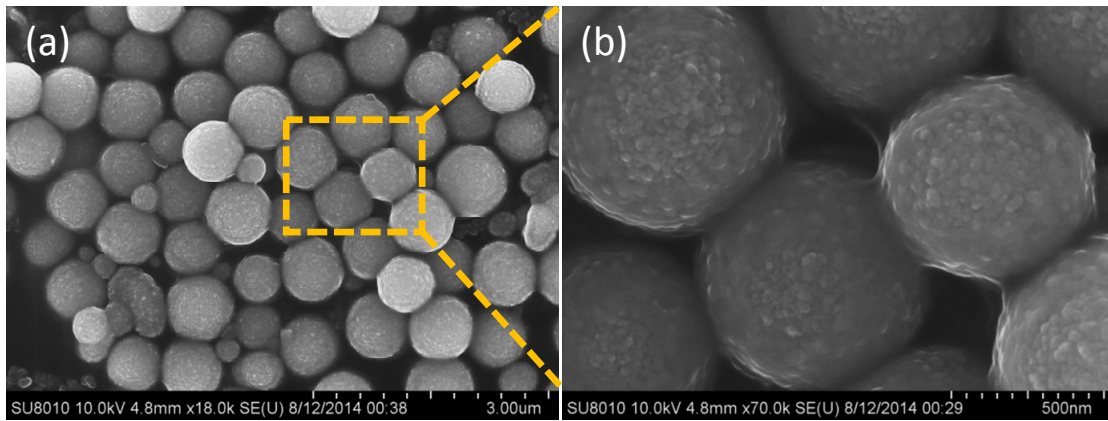

**Fig. S5** (a) Low- and (b) high-magnification FESEM images of the reduced graphene oxide and VO<sub>2</sub> composite prepared with 3 mL of VOCl<sub>2</sub> solution (0.11 M) and 1.5 mL of GO ethylene glycol dispersion (2 mg mL<sup>-1</sup>) at 200 °C after solvothermal reaction for 8h.



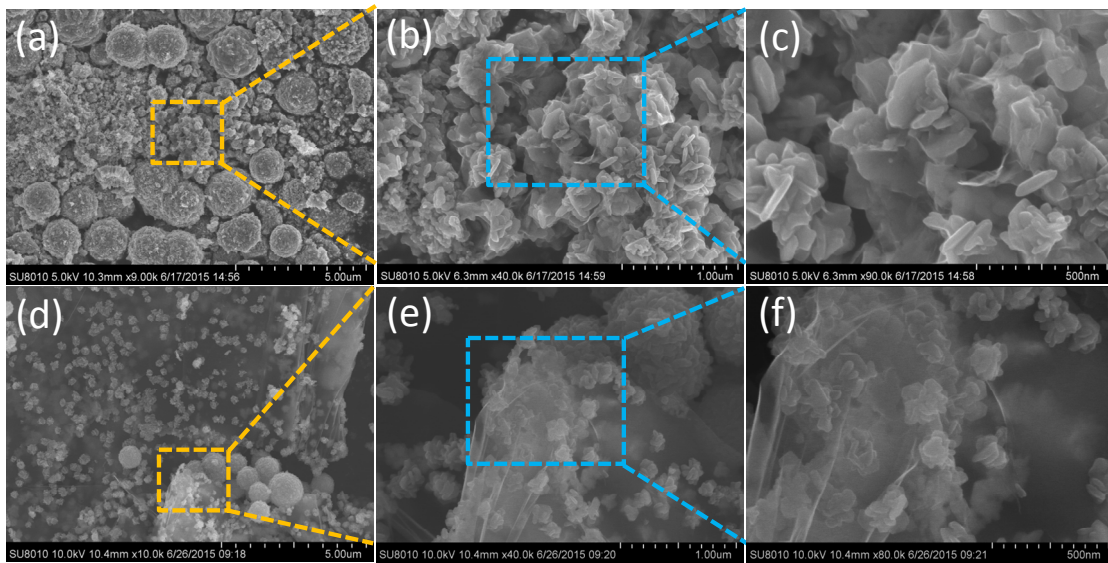

**Fig. S6** Low- and high-magnification FESEM images of the prepared reduced graphene oxide and VO<sub>2</sub> hybrids by adding 3 mL of VOCl<sub>2</sub>O<sub>4</sub> solution (0.11 M) and 5 mL of GO deionized water dispersion (a-c) or 5 mL of GO butanol dispersion (d-f), followed by solvothermal treatment at 200 °C for 8h.

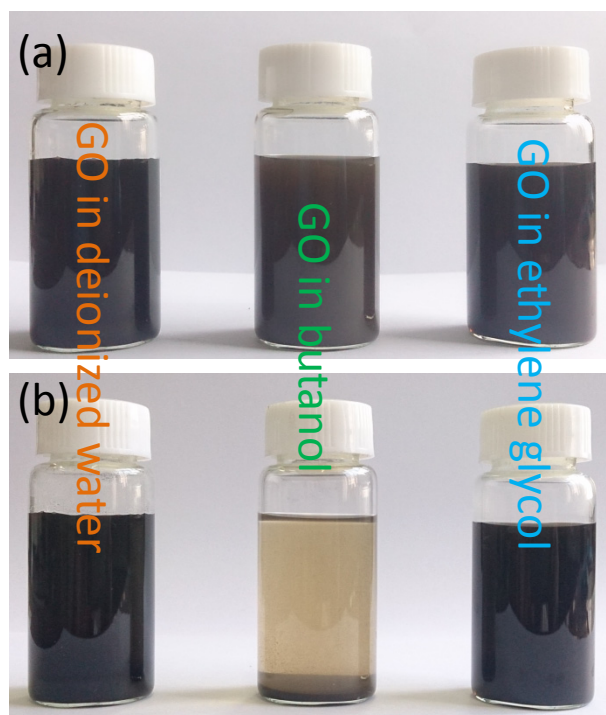

**Fig. S7** Digital photographs of graphite oxide dispersion ( $2 \text{ mg mL}^{-1}$ ) after relaxing for (a) 0.5 h and (b) 6 h.

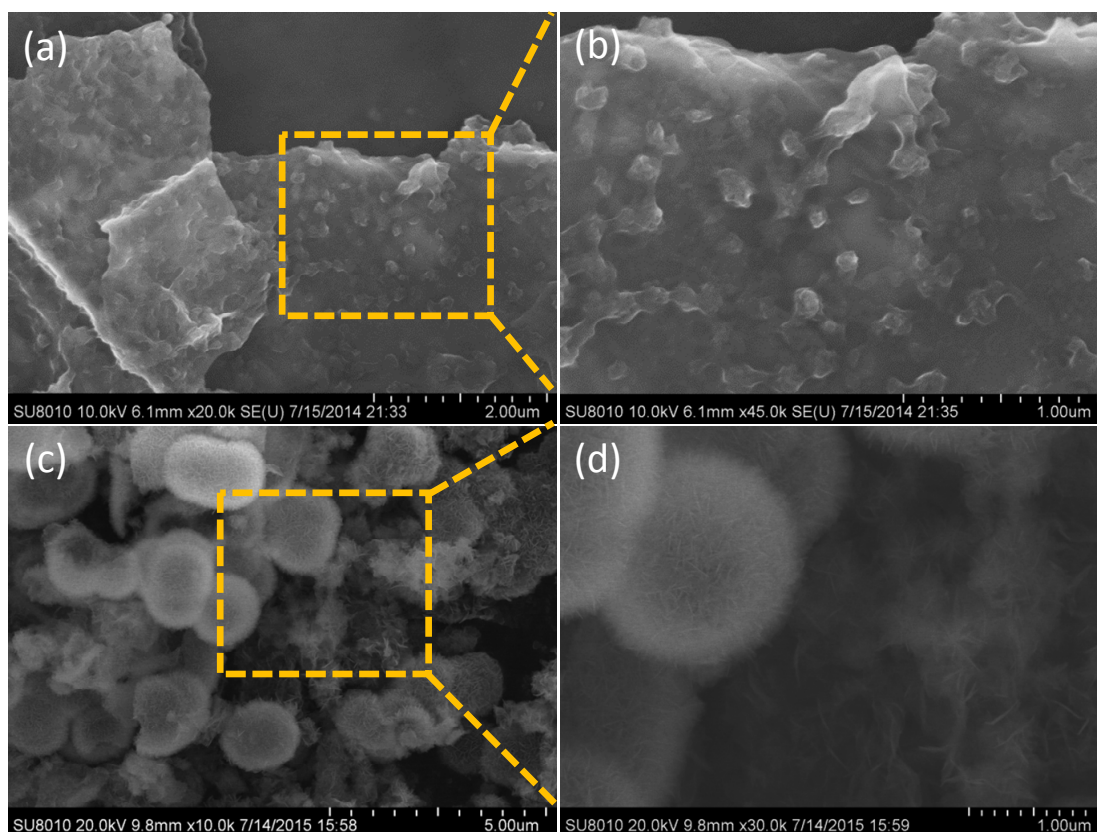

**Fig. S8** Low- and high-magnification FESEM images of the reduced graphene oxide and VO<sub>2</sub> hybrids prepared with 3 mL of VOCl<sub>2</sub>O<sub>4</sub> solution (0.11 M) and 5 mL of GO ethylene glycol dispersion (2 mg mL<sup>-1</sup>) at 200 °C reaction for 8h: (a, b) deionized water as reaction solvent and (c, d) ethylene glycol as reaction solvent.

## Experimental Section

**Preparation of cG-encapsulated M (M = Zn<sub>2</sub>SnO<sub>4</sub>, SnO<sub>2</sub>, and Ni<sub>3</sub>S<sub>2</sub>/Ni).** Hollow Zn<sub>2</sub>SnO<sub>4</sub> boxes, porous SnO<sub>2</sub> nanotubes, and Ni<sub>3</sub>S<sub>2</sub> nanobundle arrays grown on nickel foam were synthesized according to our previous work.<sup>2-4</sup> Essentially equivalent to the encapsulated procedures of VO<sub>2</sub>, viz., 10 mg M powder material and 5 mL of the prepared GO ethylene glycol dispersion (2 mg mL<sup>-1</sup>) were added into a 50 mL Teflon container pre-filled with 30 mL of isopropanol. After stirring for 30 minutes, the container was sealed in a steel autoclave and kept in an electrical oven at 160 ~ 200 °C for 8 h. After cooling down naturally, the final product was collected by vacuum filtration, alcohol washing, and hot-blast drying of the reaction precipitate.

## References

- 1 G. He, L. Li and A. Manthiram, *J. Mater. Chem. A*, 2015, **3**, 14750–14758.
- 2 Y. Zhao, Y. Huang, W. Zhang, Q. Wang, K. Wang, M. Zong and X. Sun, *RSC Adv.*, 2013, **3**, 23489–23494.
- 3 Y. Zhao, X. Li, L. Dong, B. Yan, H. Shan, D. Li and X. Sun, *Int. J. Hydrogen Energy*, 2015, **40**, 14338–14344.
- 4 X. Song, X. Li, Z. Bai, B. Yan, D. Li, X. Sun, *Nano Energy*, 2016, **26**, 533–540.
